# Supplementary material for: A high resolution spatial population database of Somalia for disease risk mapping
Source: Springer Nature journal article supplement (doi:10.1186/1476-072x-9-45), 2010-01-01

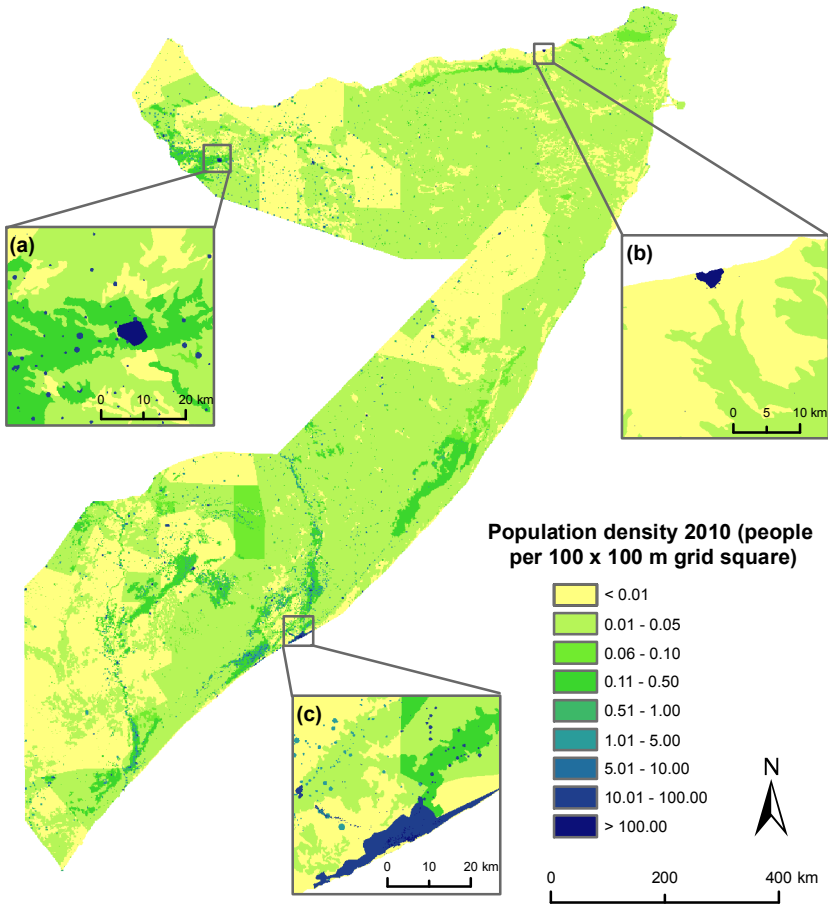

Supplement: 12942_2010_378_MOESM2_ESM.pdf [file 12942_2010_378_MOESM2_ESM.pdf]
